# Supplementary material for: Utility of the SARC-F Questionnaire for Sarcopenia Screening in Patients with Chronic Liver Disease: A Multicenter Cross-Sectional Study in Japan
Source: MDPI journal article supplement (doi:10.3390/jcm10153448), 2021-08-03
Supplement: s1 [file s1]

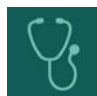

**Table S1.** Comparison of body compositions of patients with and without sarcopenia.

| Characteristics                                                     | Patients  | Total cohort     | No sarcopenia    | Sarcopenia       | P-value* |
|---------------------------------------------------------------------|-----------|------------------|------------------|------------------|----------|
| Handgrip strength, kg                                               | 676       | 26.7 (20.0–34.3) | 29.1 (21.5–35.2) | 17.8 (15.1–22.8) | <0.001   |
| Muscle mass                                                         |           |                  |                  |                  |          |
| Skeletal muscle index, cm <sup>2</sup> /m <sup>2</sup>              | 56 (8%)   | 43.3 (37.9–52.7) | 44.3 (39.0–53.3) | 32.0 (31.4–36.0) | <0.001   |
| Psoas muscle index, cm <sup>2</sup> /m <sup>2</sup>                 | 383 (57%) | 4.9 (3.8–5.8)    | 5.1 (4.0–6.1)    | 3.9 (3.3–5.0)    | <0.001   |
| Appendicular skeletal muscle index, kg <sup>2</sup> /m <sup>2</sup> | 237 (35%) | 8.6 (7.3–9.9)    | 8.8 (7.4–10.0)   | 5.6 (5.3–6.3)    | <0.001   |

Values are presented as number (percentage) or median (interquartile range). \*Mann–Whitney U test was used to compare clinical characteristics between the two groups.

**Table S2.** Comparison of body compositions of patients with SARC-F < 4 and those with ≥ 4.

| Characteristics                                                     | Patients  | Total Cohort     | SARC-F < 4       | SARC-F ≥ 4       | P-value* |
|---------------------------------------------------------------------|-----------|------------------|------------------|------------------|----------|
| Handgrip strength, kg                                               | 676       | 26.7 (20.0–34.3) | 27.8 (21.1–34.7) | 15.6 (12.7–20.9) | <0.001   |
| Muscle mass                                                         |           |                  |                  |                  |          |
| Skeletal muscle index, cm <sup>2</sup> /m <sup>2</sup>              | 56 (8%)   | 43.3 (37.9–52.7) | 44.0 (38.2–52.7) | 41.8 (36.5–50.7) | 0.675    |
| Psoas muscle index, cm <sup>2</sup> /m <sup>2</sup>                 | 383 (57%) | 4.9 (3.8–5.8)    | 8.7 (7.3–10.0)   | 7.6 (6.5–8.5)    | 0.003    |
| Appendicular skeletal muscle index, kg <sup>2</sup> /m <sup>2</sup> | 237 (35%) | 8.6 (7.3–9.9)    | 4.9 (3.9–5.8)    | 3.8 (3.3–5.2)    | 0.007    |

Values are presented as number (percentage) or median (interquartile range). \*Mann–Whitney U test was used to compare clinical characteristics between the two groups.

**Table S3.** Baseline characteristics of patients with and without sarcopenia according to sex.

| Characteristics                    | Men (N = 458)              |                        |          | Women (N = 218)            |                        |          |
|------------------------------------|----------------------------|------------------------|----------|----------------------------|------------------------|----------|
|                                    | No sarcopenia<br>(N = 399) | Sarcopenia<br>(N = 59) | P-value* | No sarcopenia<br>(N = 176) | Sarcopenia<br>(N = 42) | P-value* |
| Age, years                         | 69 (61–77)                 | 78 (73–85)             | < 0.001  | 71 (64–78)                 | 79 (74–82)             | < 0.001  |
| Body mass index, kg/m <sup>2</sup> | 23.7 (21.8–26.3)           | 22.0 (20.2–23.7)       | < 0.001  | 23.7 (21.1–26.7)           | 21.4 (19.3–24.1)       | < 0.001  |
| Etiology                           |                            |                        | 0.012    |                            |                        | 0.172    |
| Hepatitis B virus                  | 75 (19)                    | 2 (3)                  |          | 17 (10)                    | 5 (12)                 |          |
| Hepatitis C virus                  | 111 (28)                   | 20 (34)                |          | 60 (34)                    | 21 (50)                |          |
| Alcohol-related                    | 82 (21)                    | 13 (22)                |          | 14 (8)                     | 1 (2)                  |          |
| Others                             | 131 (33)                   | 24 (41)                |          | 85 (48)                    | 15 (36)                |          |
| Liver cirrhosis                    | 231 (58)                   | 44 (75)                | 0.015    | 116 (66)                   | 30 (71)                | 0.585    |
| Child-Pugh class†                  |                            |                        | 0.428    |                            |                        | 0.485    |
| A                                  | 338 (85)                   | 47 (80)                |          | 141 (80)                   | 31 (74)                |          |
| B                                  | 50 (13)                    | 11 (19)                |          | 28 (16)                    | 8 (19)                 |          |
| C                                  | 11 (3)                     | 1 (2)                  |          | 7 (4)                      | 3 (7)                  |          |
| Hepatocellular carcinoma           | 268 (67)                   | 45 (76)                | 0.179    | 84 (48)                    | 28 (67)                | 0.038    |
| SARC-F components                  |                            |                        |          |                            |                        |          |
| Strength                           |                            |                        | 0.001    |                            |                        | 0.005    |
| None (0)                           | 366 (92)                   | 45 (76)                |          | 142 (81)                   | 24 (57)                |          |
| Some (1)                           | 23 (6)                     | 13 (22)                |          | 26 (15)                    | 15 (36)                |          |
| A lot or unable (2)                | 10 (3)                     | 1 (2)                  |          | 8 (5)                      | 3 (7)                  |          |
| Assistance in walking              |                            |                        | 0.001    |                            |                        | 0.016    |
| None (0)                           | 378 (95)                   | 47 (80)                |          | 156 (89)                   | 30 (71)                |          |

|                                  |          |         |         |          |         |       |
|----------------------------------|----------|---------|---------|----------|---------|-------|
| Some (1)                         | 18 (5)   | 11 (19) |         | 18 (10)  | 11 (26) |       |
| A lot, use aids, or unable (2)   | 3 (1)    | 1 (2)   |         | 2 (1)    | 1 (2)   |       |
| Rise from a chair                |          |         | 0.003   |          |         | 0.001 |
| None (0)                         | 369 (93) | 46 (78) |         | 153 (87) | 27 (64) |       |
| Some (1)                         | 28 (7)   | 12 (20) |         | 23 (13)  | 15 (36) |       |
| A lot or unable without help (2) | 2 (1)    | 1 (2)   |         | 0 (0)    | 0 (0)   |       |
| Climb stairs                     |          |         | 0.002   |          |         | 0.009 |
| None (0)                         | 336 (84) | 38 (64) |         | 132 (75) | 23 (55) |       |
| Some (1)                         | 52 (13)  | 18 (31) |         | 41 (23)  | 15 (36) |       |
| A lot or unable (2)              | 11 (3)   | 3 (5)   |         | 3 (2)    | 4 (10)  |       |
| Falls                            |          |         | < 0.001 |          |         | 0.141 |
| None (0)                         | 350 (88) | 37 (63) |         | 137 (78) | 27 (64) |       |
| 1–3 falls (1)                    | 47 (12)  | 22 (37) |         | 37 (21)  | 14 (33) |       |
| 4 or more falls (2)              | 2 (1)    | 0 (0)   |         | 2 (1)    | 1 (2)   |       |

Values are presented as number (percentage) or median (interquartile range). †Patients with cirrhosis were evaluated.

\*The chi-square test for categorical variables or Mann–Whitney U test for continuous variables was used to compare clinical characteristics between the two groups.

**Table S4.** Sensitivity, specificity, and positive and negative predictive values for sarcopenia according to sex.

|                 | Men (N = 458)        |                      |                  |                  |
|-----------------|----------------------|----------------------|------------------|------------------|
|                 | Sensitivity (95% CI) | Specificity (95% CI) | PPV (95% CI)     | NPV (95% CI)     |
| SARC-F $\geq 1$ | 0.58 (0.44–0.70)     | 0.74 (0.69–0.78)     | 0.25 (0.18–0.33) | 0.92 (0.89–0.95) |
| SARC-F $\geq 2$ | 0.34 (0.22–0.47)     | 0.88 (0.84–0.91)     | 0.29 (0.19–0.41) | 0.90 (0.87–0.93) |
| SARC-F $\geq 3$ | 0.22 (0.12–0.35)     | 0.93 (0.89–0.95)     | 0.30 (0.17–0.46) | 0.89 (0.86–0.92) |
| SARC-F $\geq 4$ | 0.15 (0.07–0.27)     | 0.96 (0.94–0.98)     | 0.36 (0.18–0.58) | 0.89 (0.85–0.91) |
|                 | Women (N = 218)      |                      |                  |                  |
|                 | Sensitivity (95% CI) | Specificity (95% CI) | PPV (95% CI)     | NPV (95% CI)     |
| SARC-F $\geq 1$ | 0.76 (0.61–0.88)     | 0.56 (0.48–0.63)     | 0.29 (0.21–0.39) | 0.91 (0.84–0.96) |
| SARC-F $\geq 2$ | 0.45 (0.30–0.61)     | 0.76 (0.69–0.82)     | 0.31 (0.20–0.44) | 0.85 (0.79–0.90) |
| SARC-F $\geq 3$ | 0.36 (0.22–0.52)     | 0.86 (0.80–0.91)     | 0.39 (0.23–0.55) | 0.85 (0.79–0.90) |
| SARC-F $\geq 4$ | 0.29 (0.16–0.45)     | 0.90 (0.84–0.94)     | 0.40 (0.23–0.59) | 0.84 (0.78–0.89) |

CI, confidence interval; NPV, negative predictive value; PPV, positive predictive value.

**Table S5.** Baseline characteristics of patients with and without sarcopenia according to age.

| Characteristics                    | Age < 65 years (N = 183)   |                       |          | Age $\geq 65$ years (N = 493) |                        |          |
|------------------------------------|----------------------------|-----------------------|----------|-------------------------------|------------------------|----------|
|                                    | No sarcopenia<br>(N = 174) | Sarcopenia<br>(N = 9) | P-value* | No sarcopenia<br>(N = 401)    | Sarcopenia<br>(N = 92) | P-value* |
| Age, years                         | 56 (50–61)                 | 61 (61–63)            | 0.022    | 74 (70–79)                    | 79 (75–84)             | <0.001   |
| Body mass index, kg/m <sup>2</sup> | 24.1 (21.6–27.1)           | 21.2 (19.3–22.4)      | 0.005    | 23.6 (21.7–26.3)              | 21.8 (19.8–24.0)       | <0.001   |
| Male sex                           | 129 (74)                   | 5 (56)                | 0.252    | 270 (67)                      | 54 (59)                | 0.144    |
| Etiology                           |                            |                       | 0.408    |                               |                        | 0.184    |
| Hepatitis B virus                  | 33 (19)                    | 0 (0)                 |          | 59 (15)                       | 7 (8)                  |          |
| Hepatitis C virus                  | 38 (22)                    | 3 (33)                |          | 133 (33)                      | 38 (41)                |          |
| Alcohol-related                    | 35 (20)                    | 3 (33)                |          | 61 (15)                       | 11 (12)                |          |
| Others                             | 68 (39)                    | 3 (33)                |          | 148 (37)                      | 36 (39)                |          |

|                                  |          |        |         |          |         |       |
|----------------------------------|----------|--------|---------|----------|---------|-------|
| Liver cirrhosis                  | 92 (53)  | 8 (89) | 0.042   | 255 (64) | 66 (72) | 0.147 |
| Child-Pugh class†                |          |        | 0.005   |          |         | 0.301 |
| A                                | 139 (80) | 3 (33) |         | 340 (85) | 75 (82) |       |
| B                                | 22 (13)  | 5 (56) |         | 56 (14)  | 14 (15) |       |
| C                                | 13 (8)   | 1 (11) |         | 5 (1)    | 3 (3)   |       |
| Hepatocellular carcinoma         | 69 (40)  | 5 (56) | 0.488   | 283 (71) | 68 (74) | 0.610 |
| SARC-F components                |          |        |         |          |         |       |
| Strength                         |          |        | < 0.001 |          |         | 0.001 |
| None (0)                         | 165 (95) | 4 (44) |         | 343 (86) | 65 (71) |       |
| Some (1)                         | 7 (4)    | 5 (56) |         | 42 (11)  | 23 (25) |       |
| A lot or unable (2)              | 2 (1)    | 0 (0)  |         | 16 (4)   | 4 (4)   |       |
| Assistance in walking            |          |        | < 0.001 |          |         | 0.002 |
| None (0)                         | 169 (97) | 5 (56) |         | 365 (91) | 72 (78) |       |
| Some (1)                         | 5 (3)    | 4 (44) |         | 31 (8)   | 18 (20) |       |
| A lot, use aids, or unable (2)   | 0 (0)    | 0 (0)  |         | 5 (1)    | 2 (2)   |       |
| Rising from a chair              |          |        | < 0.001 |          |         | 0.004 |
| None (0)                         | 171 (98) | 5 (56) |         | 351 (88) | 68 (74) |       |
| Some (1)                         | 3 (2)    | 4 (44) |         | 48 (12)  | 23 (25) |       |
| A lot or unable without help (2) | 0 (0)    | 0 (0)  |         | 2 (1)    | 1 (1)   |       |
| Climbing stairs                  |          |        | 0.003   |          |         | 0.007 |
| None (0)                         | 163 (94) | 5 (56) |         | 305 (76) | 56 (61) |       |
| Some (1)                         | 10 (6)   | 4 (44) |         | 83 (21)  | 29 (32) |       |
| A lot or unable (2)              | 1 (1)    | 0 (0)  |         | 13 (3)   | 7 (8)   |       |
| Falls                            |          |        | 0.011   |          |         | 0.001 |
| None (0)                         | 158 (91) | 5 (56) |         | 329 (82) | 59 (64) |       |
| 1–3 falls (1)                    | 14 (8)   | 4 (44) |         | 70 (18)  | 32 (35) |       |
| 4 or more falls (2)              | 2 (1)    | 0 (0)  |         | 2 (1)    | 1 (1)   |       |

Values are presented as number (percentage) or median (interquartile range). †Patients with cirrhosis were evaluated.

\*The chi-square test for categorical variables or Mann–Whitney U test for continuous variables were used to compare clinical characteristics between the two groups.

**Table S6.** Sensitivity, specificity, and positive and negative predictive values for sarcopenia according to age.

| Age < 65 years (N = 183) |                      |                      |                  |                  |
|--------------------------|----------------------|----------------------|------------------|------------------|
|                          | Sensitivity (95% CI) | Specificity (95% CI) | PPV (95% CI)     | NPV (95% CI)     |
| SARC-F ≥ 1               | 0.67 (0.30–0.93)     | 0.85 (0.78–0.90)     | 0.18 (0.07–0.36) | 0.98 (0.94–0.99) |
| SARC-F ≥ 2               | 0.44 (0.14–0.79)     | 0.95 (0.90–0.98)     | 0.31 (0.09–0.61) | 0.97 (0.93–0.99) |
| SARC-F ≥ 3               | 0.44 (0.14–0.79)     | 0.97 (0.93–0.99)     | 0.44 (0.14–0.79) | 0.97 (0.93–0.99) |
| SARC-F ≥ 4               | 0.44 (0.14–0.79)     | 0.98 (0.95–0.99)     | 0.57 (0.18–0.90) | 0.97 (0.94–0.99) |
| Age ≥ 65 years (N = 493) |                      |                      |                  |                  |
|                          | Sensitivity (95% CI) | Specificity (95% CI) | PPV (95% CI)     | NPV (95% CI)     |
| SARC-F ≥ 1               | 0.65 (0.55–0.75)     | 0.61 (0.56–0.66)     | 0.28 (0.22–0.34) | 0.89 (0.84–0.92) |
| SARC-F ≥ 2               | 0.38 (0.28–0.49)     | 0.79 (0.75–0.83)     | 0.30 (0.22–0.39) | 0.85 (0.81–0.88) |
| SARC-F ≥ 3               | 0.26 (0.18–0.36)     | 0.88 (0.84–0.91)     | 0.33 (0.22–0.45) | 0.84 (0.80–0.87) |
| SARC-F ≥ 4               | 0.19 (0.11–0.28)     | 0.92 (0.89–0.95)     | 0.35 (0.22–0.51) | 0.83 (0.79–0.87) |

CI, confidence interval; NPV, negative predictive value; PPV, positive predictive value.

**Table S7.** Baseline characteristics of patients with and without sarcopenia according to sarcopenia diagnostic methods.

|                                    | Skeletal muscle index (N = 56) |                        |          | Psoas muscle index (N = 383) |                         |          | Appendicular skeletal muscle mass index (N = 237) |                         |          |
|------------------------------------|--------------------------------|------------------------|----------|------------------------------|-------------------------|----------|---------------------------------------------------|-------------------------|----------|
|                                    | No sar-copenia<br>(N = 49)     | Sarcope-nia<br>(N = 7) | P-value* | No sar-copenia<br>(N = 303)  | Sarcope-nia<br>(N = 80) | P-value* | No sar-copenia<br>(N = 223)                       | Sarcope-nia<br>(N = 14) | P-value* |
| Characteristics                    |                                |                        |          |                              |                         |          |                                                   |                         |          |
| Age, years                         | 74 (68–79)                     | 79 (76–79)             | 0.180    | 70 (62–77)                   | 78 (72–83)              | <0.001   | 70 (60–77)                                        | 84 (77–86)              | <0.001   |
| Body mass index, kg/m <sup>2</sup> | 24.2 (21.9–27.1)               | 22.8 (20.6–26.1)       | 0.407    | 23.4 (21.5–25.6)             | 22.0 (19.9–24.0)        | <0.001   | 24.1 (21.9–27.3)                                  | 20.6 (18.9–21.8)        | <0.001   |
| Male sex                           | 30 (61)                        | 2 (29)                 | 0.125    | 209 (69)                     | 50 (63)                 | 0.284    | 160 (72)                                          | 7 (50)                  | 0.127    |
| Etiology                           |                                |                        | 0.192    |                              |                         | 0.003    |                                                   |                         | 0.341    |
| Hepatitis B virus                  | 15 (31)                        | 1 (14)                 |          | 46 (15)                      | 4 (5)                   |          | 31 (14)                                           | 2 (14)                  |          |
| Hepatitis C virus                  | 9 (18)                         | 4 (57)                 |          | 152 (50)                     | 35 (44)                 |          | 10 (5)                                            | 2 (14)                  |          |
| Alcohol-related                    | 8 (16)                         | 0 (0)                  |          | 50 (17)                      | 13 (16)                 |          | 38 (17)                                           | 1 (7)                   |          |
| Others                             | 17 (35)                        | 2 (29)                 |          | 55 (18)                      | 28 (35)                 |          | 144 (65)                                          | 9 (64)                  |          |
| Liver cirrhosis                    | 41 (84)                        | 6 (86)                 | 1.000    | 162 (54)                     | 55 (69)                 | 0.016    | 144 (65)                                          | 13 (93)                 | 0.039    |
| Child-Pugh classt                  |                                |                        | 0.201    |                              |                         | 0.090    |                                                   |                         | 0.832    |
| A                                  | 34 (69)                        | 3 (43)                 |          | 269 (89)                     | 64 (80)                 |          | 176 (79)                                          | 11 (79)                 |          |
| B                                  | 13 (27)                        | 3 (43)                 |          | 26 (9)                       | 13 (16)                 |          | 39 (18)                                           | 3 (21)                  |          |
| C                                  | 2 (4)                          | 1 (14)                 |          | 8 (3)                        | 3 (4)                   |          | 8 (4)                                             | 0 (0)                   |          |
| Hepatocellular carcinoma           | 29 (59)                        | 2 (29)                 | 0.223    | 172 (57)                     | 57 (71)                 | 0.021    | 151 (68)                                          | 14 (100)                | 0.007    |
| SARC-F components                  |                                |                        |          |                              |                         |          |                                                   |                         |          |
| Strength                           |                                |                        | 0.190    |                              |                         | <0.001   |                                                   |                         | 0.033    |
| None (0)                           | 30 (61)                        | 3 (43)                 |          | 284 (94)                     | 57 (71)                 |          | 194 (87)                                          | 9 (64)                  |          |
| Some (1)                           | 12 (25)                        | 1 (14)                 |          | 19 (6)                       | 23 (29)                 |          | 18 (8)                                            | 4 (29)                  |          |
| A lot or unable (2)                | 7 (14)                         | 3 (43)                 |          | 0 (0)                        | 0 (0)                   |          | 11 (5)                                            | 1 (7)                   |          |
| Assistance in walking              |                                |                        | 0.696    |                              |                         | <0.001   |                                                   |                         | 0.010    |
| None (0)                           | 39 (80)                        | 5 (71)                 |          | 289 (95)                     | 62 (78)                 |          | 206 (92)                                          | 10 (71)                 |          |
| Some (1)                           | 8 (16)                         | 2 (29)                 |          | 14 (5)                       | 18 (23)                 |          | 14 (6)                                            | 2 (14)                  |          |
| A lot, use aids, or unable (2)     | 2 (4)                          | 0 (0)                  |          | 0 (0)                        | 0 (0)                   |          | 3 (1)                                             | 2 (14)                  |          |
| Rising from a chair                |                                |                        | 0.658    |                              |                         | <0.001   |                                                   |                         | 0.001    |
| None (0)                           | 38 (78)                        | 5 (71)                 |          | 279 (92)                     | 60 (75)                 |          | 205 (92)                                          | 8 (57)                  |          |
| Some (1)                           | 11 (22)                        | 2 (29)                 |          | 24 (8)                       | 20 (25)                 |          | 16 (7)                                            | 5 (36)                  |          |
| A lot or unable without help (2)   | 0 (0)                          | 0 (0)                  |          | 0 (0)                        | 0 (0)                   |          | 2 (1)                                             | 1 (7)                   |          |
| Climbing stairs                    |                                |                        | 0.272    |                              |                         | <0.001   |                                                   |                         | <0.001   |
| None (0)                           | 28 (57)                        | 3 (43)                 |          | 254 (84)                     | 52 (65)                 |          | 186 (83)                                          | 6 (43)                  |          |
| Some (1)                           | 17 (35)                        | 2 (29)                 |          | 49 (16)                      | 28 (35)                 |          | 27 (12)                                           | 3 (21)                  |          |
| A lot or unable (2)                | 4 (8)                          | 2 (29)                 |          | 0 (0)                        | 0 (0)                   |          | 10 (5)                                            | 5 (36)                  |          |
| Falls                              |                                |                        | 0.729    |                              |                         | <0.001   |                                                   |                         | 0.001    |
| None (0)                           | 37 (76)                        | 5 (71)                 |          | 263 (87)                     | 53 (66)                 |          | 187 (84)                                          | 6 (43)                  |          |
| 1–3 falls (1)                      | 10 (20)                        | 2 (29)                 |          | 40 (13)                      | 27 (34)                 |          | 34 (15)                                           | 7 (50)                  |          |
| 4 or more falls (2)                | 2 (4)                          | 0 (0)                  |          | 0 (0)                        | 0 (0)                   |          | 2 (1)                                             | 1 (7)                   |          |

Values are presented as number (percentage) or median (interquartile range). †Patients with cirrhosis were evaluated.

\*The chi-square test for categorical variables or Mann–Whitney U test for continuous variables were used to compare clinical characteristics between the two groups.

**Table S8.** Sensitivity, specificity, and positive and negative predictive values for sarcopenia according to sarcopenia diagnostic methods.

|                 | Skeletal muscle index (N = 56)                    |                      |                  |                  |
|-----------------|---------------------------------------------------|----------------------|------------------|------------------|
|                 | Sensitivity (95% CI)                              | Specificity (95% CI) | PPV (95% CI)     | NPV (95% CI)     |
| SARC-F $\geq 1$ | 0.71 (0.29–0.96)                                  | 0.71 (0.29–0.96)     | 0.15 (0.05–0.31) | 0.91 (0.71–0.99) |
| SARC-F $\geq 2$ | 0.57 (0.18–0.90)                                  | 0.57 (0.42–0.71)     | 0.16 (0.05–0.36) | 0.90 (0.74–0.98) |
| SARC-F $\geq 3$ | 0.43 (0.10–0.82)                                  | 0.74 (0.59–0.85)     | 0.19 (0.04–0.46) | 0.90 (0.76–0.97) |
| SARC-F $\geq 4$ | 0.43 (0.10–0.82)                                  | 0.82 (0.68–0.91)     | 0.25 (0.06–0.57) | 0.91 (0.78–0.98) |
|                 | Psoas muscle index (N = 383)                      |                      |                  |                  |
|                 | Sensitivity (95% CI)                              | Specificity (95% CI) | PPV (95% CI)     | NPV (95% CI)     |
| SARC-F $\geq 1$ | 0.64 (0.52–0.74)                                  | 0.74 (0.68–0.79)     | 0.39 (0.31–0.48) | 0.89 (0.84–0.92) |
| SARC-F $\geq 2$ | 0.34 (0.24–0.45)                                  | 0.87 (0.82–0.90)     | 0.40 (0.28–0.52) | 0.83 (0.79–0.87) |
| SARC-F $\geq 3$ | 0.23 (0.14–0.33)                                  | 0.95 (0.92–0.97)     | 0.53 (0.35–0.70) | 0.82 (0.78–0.86) |
| SARC-F $\geq 4$ | 0.16 (0.09–0.26)                                  | 0.97 (0.92–0.96)     | 0.59 (0.36–0.79) | 0.81 (0.77–0.85) |
|                 | Appendicular skeletal muscle mass index (N = 237) |                      |                  |                  |
|                 | Sensitivity (95% CI)                              | Specificity (95% CI) | PPV (95% CI)     | NPV (95% CI)     |
| SARC-F $\geq 1$ | 0.71 (0.42–0.92)                                  | 0.67 (0.61–0.73)     | 0.12 (0.06–0.21) | 0.97 (0.94–0.99) |
| SARC-F $\geq 2$ | 0.57 (0.29–0.82)                                  | 0.87 (0.81–0.91)     | 0.21 (0.10–0.37) | 0.97 (0.94–0.99) |
| SARC-F $\geq 3$ | 0.50 (0.23–0.77)                                  | 0.89 (0.84–0.93)     | 0.22 (0.09–0.40) | 0.97 (0.93–0.99) |
| SARC-F $\geq 4$ | 0.36 (0.13–0.65)                                  | 0.93 (0.89–0.96)     | 0.24 (0.08–0.47) | 0.96 (0.92–0.98) |

CI, confidence interval; NPV, negative predictive value; PPV, positive predictive value.
